# Supplementary material
Source: PubMed Central journal article supplement (PMC5989935)
Supplement: NIHMS77076-supplement-Supplementary_figure_1.pdf [file NIHMS77076-supplement-Supplementary_figure_1.pdf]

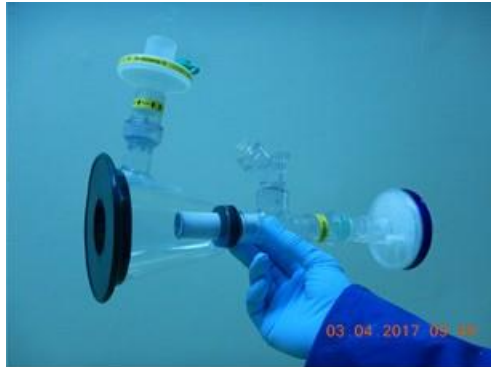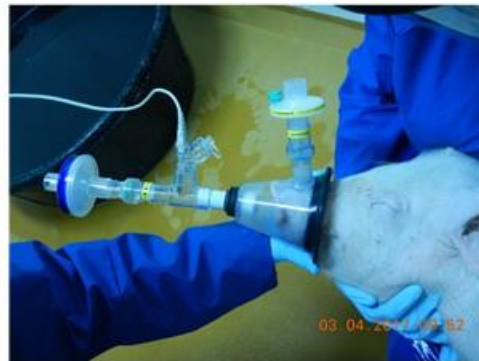

**Supplemental Figure. Aerosol delivery of H3N2 S-FLU in pigs. Custom built mask for aerosol delivery in pigs.**
